# Supplementary material for: Hepatic Metabolomics Investigation in Acute and Chronic Murine Toxoplasmosis
Source: Front Cell Infect Microbiol. 2018 Jun 5;8:189. doi: 10.3389/fcimb.2018.00189 (PMC5996072; doi:10.3389/fcimb.2018.00189)
Supplement: Table S3 — List of metabolites identified during chronic Toxoplasma gondii infection. [file Table_3.XLSX]

## Sheet: Table S3
Table S3. List of metabolites identified during chronic Toxoplasma gondii infection.
Compound ID	Ratio	t.test_p.value_BHcorrect	VIP	KEGG.ID	Formula	Mass.Error..ppm.	Metabolite	Pathway
ESI+
10.01_435.2636	1.65623	8.75e-03	1.06156	C07670	C27H36N2O4	-1.44	Repaglinide;
10.17_144.9951	0.39	1.65e-02	1.1527	C11214	CH6N4S	6.29	Thiocarbohydrazide; 1,3-Diamino-2-thiourea;
10.17_174.1280	0.35	1.78e-02	1.25939	C10938	C12H17NO	1.69	N,N-Diethylphenylacetamide; DEPA;
10.17_290.9267	0.48	3.42e-03	1.28306	C11146	CH3ClHg	2.35	Methylmercury chloride;
10.17_369.3522	2.39322	5.49e-03	1.26941	C00187	C27H46O	1.56	Cholesterol; Cholest-5-en-3beta-ol;	map00100 Steroid biosynthesis; map00120 Primary bile acid biosynthesis; map00140 Steroid hormone biosynthesis; map01100 Metabolic pathways; map04340 Hedgehog signaling pathway; map04913 Ovarian steroidogenesis; map04925 Aldosterone synthesis and secretion; map04975 Fat digestion and absorption; map04976 Bile secretion; map04977 Vitamin digestion and absorption; map05200 Pathways in cancer; map052…
10.18_477.3896	0.43	1.17e-02	1.31144	C19656	C30H52O4	-8.97	Sarcoaldesterol A; (3beta,5alpha,6beta,11alpha)-Gorgostane-3,5,6,11-tetrol;
10.18_769.3891	2.51101	4.63e-03	1.4808	C18097	C37H52N8O10	1.49	Deltorphin C; Deltorphin I;
10.18_769.4795	2.55998	8.66e-03	1.95604	C16784	C41H68O13	8.13	HMT-toxin;
10.18_828.4643	2.47441	8.83e-03	1.86227	C15704	C43H65N5O9S	8.09	Tubulysin D;
10.23_854.4774	3.30176	3.06e-03	1.8802	C20006	C44H68O13S	6.58	Acanthifolicin; Acanthifolic acid;
10.23_854.5671	3.39696	2.25e-03	2.11405	C13888	C43H81O13P	-9.85	1-Hexadecanoyl-2-(9Z-octadecenoyl)-sn-glycero-3-phospho-1'-myo-inositol;
10.25_745.4795	2.80585	4.59e-03	2.11007	C20094	C35H60N12O6	-4.97	Argiopinin II;
10.25_810.5318	2.09849	2.08e-03	1.09205	C06764	C44H72O12	-5.54	Tetranactin;
10.26_495.2666	0.21	8.83e-03	1.86831	C20972	C26H36N6O5	-9.36	Angiotensin (5-8); Angiotensin-(5-8);	map04614 Renin-angiotensin system;
10.26_866.5236	1.90164	3.95e-03	1.2089	C15761	C46H75NO14	-2.85	Concanamycin A;
10.28_792.5619	3.06281	8.56e-03	2.2768	C13871	C45H74O10	-0.19	1,2-Di-(9Z,12Z,15Z-octadecatrienoyl)-3-O-beta-D-galactosyl-sn-glycerol;
10.29_758.5683	3.13716	2.86e-03	2.14685	C04873	C40H84N2O5PS+	-6.45	1-Hexadecylthio-2-hexadecanoylamino-1,2-dideoxy-sn-glycero-3-phosphocholine;
10.31_1184.8428	3.95395	2.77e-03	2.14597	C05086	C62H111N11O12	3.96	Cyclosporin A; Ciclosporin; Cyclosporine;
10.31_337.1694	2.14569	2.92e-03	1.23198	C06687	C16H18FN3O3	7.26	Norfloxacin;	map02010 ABC transporters;
10.31_390.7709	1.98292	2.25e-02	1.60638	C18960	C9H4Cl8O	-6.97	Isobenzan; Telodrin;
10.31_830.4821	1.84286	2.22e-02	1.4424	C08932	C42H68O15	-9.26	Bayogenin 3-O-cellobioside;
10.36_504.3453	2.04542	3.27e-04	1.41795	C13903	C24H52NO6P	5.99	1-O-Hexadecyl-lyso-sn-glycero-3-phosphocholine; 1-O-Hexadecyl-2-lyso-sn-glycero-3-phosphocholine;
10.36_784.5030	4.03493	8.50e-04	2.17747	C13880	C40H76NO10P	-9.02	1-Hexadecanoyl-2-(9Z-octadecenoyl)-sn-glycero-3-phosphoserine;
10.36_792.4969	4.8601	4.28e-03	2.69818	C12102	C43H69NO12	9.61	Immunomycin; Ascomycin; FK520;
10.39_814.4885	2.50004	1.51e-02	1.32795	C19865	C42H68O14	-7.86	Soyasaponin III;
10.42_382.2412	0.48	4.55e-04	1.30925	C15380	C21H29FO4	6.55	9-Fluoro-11beta,16alpha-dihydroxypregn-4-ene-3,20-dione;
10.49_415.2613	0.67	1.88e-04	1.00633	C03990	C24H40O3	0.99	Lithocholic acid; Lithocholate; 3alpha-Hydroxy-5beta-cholanate; 3alpha-Hydroxy-5beta-cholanic acid;	map04976 Bile secretion;
10.49_697.4786	2.47447	2.45e-03	1.1026	C13889	C37H71O8P	1.06	1-Hexadecanoyl-2-(9Z-octadecenoyl)-sn-glycero-3-phosphate; 1-Hexadecanoyl-2-(9Z-octadecenoyl)-sn-glycerol 3-phosphate;
10.51_744.5907	2.46865	9.85e-03	1.14098	C17569	C49H74O4	-2.51	Ubiquinone-8; Coenzyme Q8;	map00130 Ubiquinone and other terpenoid-quinone biosynthesis;
10.51_816.5048	1.93269	4.55e-02	1.12124	C08985	C42H70O14	-7.04	Thalicoside A;
10.52_836.6116	2.36034	9.76e-03	1.68598	C04218	C44H82O13	2.74	alpha,alpha'-Trehalose 6-mycolate;
10.54_1149.3433	0.29	1.24e-04	1.37335	C04702	C40H65N9O26P2	-7.23	UDPMurNAc(oyl-L-Ala-D-gamma-Glu-L-Lys-D-Ala-D-Ala); UDP-N-acetylmuramoyl-L-alanyl-gamma-D-glutamyl-L-lysyl-D-alanyl-D-alanine; UDP-N-acetylmuramoyl-L-alanyl-D-glutamyl-L-lysyl-D-alanyl-D-alanine;	map01100 Metabolic pathways;
10.56_759.4970	2.26791	2.49e-03	1.42291	C20093	C36H63N12O6+	-3.16	Argiopinin I;
10.59_432.7638	1.81628	3.56e-02	1.36689	C18959	C9H6Cl8	7.35	Chlorbicyclen;
10.59_773.5125	2.04885	2.17e-02	1.73839	C11311	C45H74O11	-9.22	Oligomycin A;
10.65_749.5108	3.634	2.27e-03	2.15459	C06838	C38H72N2O12	-6.66	Azithromycin;
10.65_944.5586	2.31068	2.20e-02	1.73066	C08976	C48H78O17	0.96	Saikosaponin BK1;
10.87_400.7753	3.69761	2.94e-03	1.33881	C18749	C4H7Br2Cl2O4P	9.28	Naled;
11.27_619.4488	0.61	1.13e-02	1.1039	C15881	C42H60O2	0.48	Spirilloxanthin; Rhodoviolascin;	map01100 Metabolic pathways;
11.93_179.0649	0.65	3.73e-04	1.02751	C01044	C5H7NO5	-8.08	N-Formyl-L-aspartate;	map00340 Histidine metabolism;
4.87_376.2134	3.35891	1.75e-03	1.59972	C07370	C21H26O5	4.19	Prednisone;
4.99_218.2123	3.63025	7.78e-03	1.86527	C02679	C12H24O2	4.36	Dodecanoic acid; Dodecanoate; Dodecylcarboxylate; Lauric acid;	map00061 Fatty acid biosynthesis; map01100 Metabolic pathways;
5.07_376.2135	3.97519	8.92e-03	1.73921	C11053	C21H26O5	4.57	9,10-Dihydrokadsurenone;
5.13_251.1264	3.87586	1.37e-02	1.1464	C16308	C12H20O4	4.30	Traumatic acid; (2E)-Dodecenedioic acid; Dodec-2-enedioic acid;	map00592 alpha-Linolenic acid metabolism;
5.15_312.0810	4.45791	1.90e-02	1.15353	C17398	C13H16N2O5S	9.55	Epithienamycin D;
5.30_285.0776	0.45	9.90e-03	1.00674	C10047	C16H12O5	6.63	Geraldone; 5-Deoxychrysoeriol;
5.48_203.1041	3.84464	3.38e-02	1.30549	C06658	C8H14N2O4	7.32	Proclavaminic acid; Proclavaminate;
5.62_801.2950	0.28	6.28e-04	1.49815	C12386	C40H50O18	-1.76	Premithramycin A3';
5.63_901.4146	0.35	7.03e-04	1.09299	C20008	C42H70O17S	-9.07	Hoffmanniolide;
5.64_859.4555	0.12	3.43e-06	2.20359	C08059	C47H64N4O12	7.62	Rifapentine;
5.66_180.1154	4.76668	1.17e-03	1.17625	C03929	C11H16O2	2.03	3-tert-Butyl-5-methylcatechol;
5.66_265.0766	6.86595	1.62e-02	2.02826	C12599	C8H10FN3O3S	0.41	Emtricitabine;
5.66_297.1038	3.28174	1.49e-03	1.52131	C18613	C15H15ClN6	7.76	Pyraclonil;
5.66_841.4681	0.14	4.50e-04	1.57251	C11967	C47H70O14	-6.06	Avermectin B1b;
5.73_246.2433	1.70246	3.62e-03	1.19483	C06424	C14H28O2	2.57	Tetradecanoic acid; Tetradecanoate; Myristic acid;	map00061 Fatty acid biosynthesis; map01100 Metabolic pathways;
5.74_290.2700	1.65451	4.98e-03	1.21522	C18218	C16H32O3	3.87	16-Hydroxypalmitate; 16-Hydroxypalmitic acid;	map01100 Metabolic pathways;
5.77_334.2965	1.67609	1.99e-02	1.19772	C15988	C18H36O4	4.22	(9S,10S)-9,10-Dihydroxyoctadecanoate;
5.79_399.1796	2.84196	4.45e-02	1.39403	C04303	C19H22N6O4	5.08	N-Benzoyl-D-arginine-4-nitroanilide; Bz-Arg-p-nitroanilide;
5.79_841.3817	0.14	2.41e-04	1.54769	C11269	C43H49N7O10	-7.60	Virginiamycin S1; Virginiamycin factor S;
5.82_953.5163	0.17	1.29e-04	1.95978	C19996	C46H68N10O12	7.53	Microcystin RA;
5.98_346.2158	6.554	5.15e-04	2.47018	C05497	C21H30O4	4.03	21-Deoxycortisol; 4-Pregnene-11beta,17alpha-diol-3,20-dione; 11beta,17alpha-Dihydroxyprogesterone;	map00140 Steroid hormone biosynthesis;
6.08_267.1213	2.79704	5.98e-03	1.13074	C01136	C10H19NO2S2	7.11	S-Acetyldihydrolipoamide; 6-S-Acetyldihydrolipoamide;
6.11_263.1270	2.26162	5.35e-03	1.14451	C19897	C11H11N5O2	7.91	Debromohymenialdisine; (Z)-Debromohymenialdisine; DBH;
6.12_313.1786	2.67525	1.93e-02	1.11725	C13854	C15H30O4	3.91	1-Dodecanoyl-sn-glycerol;
6.17_405.1904	6.68427	1.39e-03	1.83285	C16809	C22H30O8	-0.92	Isovaltrate;
6.19_389.2306	7.21138	8.16e-03	2.1161	C05481	C21H34O5	2.05	Cortolone;	map00140 Steroid hormone biosynthesis;
6.19_953.4947	0.18	2.66e-04	1.62096	C15848	C46H66N12O9	-2.26	Angiotensin III;	map04080 Neuroactive ligand-receptor interaction; map04614 Renin-angiotensin system;
6.23_453.1867	2.65527	2.92e-02	1.23512	C08441	C22H30N4O4	-7.61	Tentoxin;
6.30_208.1468	4.46072	5.27e-03	1.46412	C14236	C13H20O2	2.43	4-Heptyloxyphenol; p-n-Heptyloxyphenol;
6.31_794.7163	0.12	5.00e-04	1.70573	C01829	C15H11I4NO4	-5.46	Thyroxine; Levothyroxin; L-Thyroxine; O-(4-Hydroxy-3,5-diidophenyl)-3,5-diiodo-L-tyrosine; 3,5,3'5'-Tetraiodo-L-thyronine; T4;	map00350 Tyrosine metabolism; map01100 Metabolic pathways; map04080 Neuroactive ligand-receptor interaction; map04918 Thyroid hormone synthesis; map04919 Thyroid hormone signaling pathway; map04976 Bile secretion; map05320 Autoimmune thyroid disease;
6.40_247.1318	3.13613	2.62e-02	1.19071	C11512	C13H20O3	5.96	Methyl jasmonate; (-)-Methyl jasmonate;	map00592 alpha-Linolenic acid metabolism;
6.41_345.1213	2.97331	5.04e-03	1.35163	C09773	C15H22O10	9.22	Catalpol;
6.41_345.1683	4.27968	2.81e-03	1.38953	C03958	C16H22N6O4	3.71	Thyrotropin-releasing hormone; TRH; Protirelin; Thyroliberin;	map04080 Neuroactive ligand-receptor interaction;
6.41_407.1405	7.02325	2.74e-03	1.82848	C07467	C23H24N2O4S	-4.42	Eprosartan;
6.49_287.1648	2.67628	1.29-02	1.10799	C05298	C18H22O3	2.04	2-Hydroxyestrone;	map00140 Steroid hormone biosynthesis;
6.49_375.2150	2.01799	3.26e-02	1.00704	C00584	C20H32O5	2.28	Prostaglandin E2; (5Z,13E)-(15S)-11alpha,15-Dihydroxy-9-oxoprosta-5,13-dienoate; (5Z,13E)-(15S)-11alpha,15-Dihydroxy-9-oxoprost-13-enoate; Dinoprostone; PGE2;	map00590 Arachidonic acid metabolism; map01100 Metabolic pathways; map04024 cAMP signaling pathway; map04080 Neuroactive ligand-receptor interaction; map04726 Serotonergic synapse; map04750 Inflammatory mediator regulation of TRP channels; map04921 Oxytocin signaling pathway; map04923 Regulation of lipolysis in adipocytes; map04924 Renin secretion; map04976 Bile secretion; map05140 Leishmaniasis;…
6.55_412.3063	3.39591	2.65-02	1.15179	C12000	C23H38O5	1.47	Tylactone; Protylonolide;
6.59_443.2060	3.29345	2.86e-02	1.19234	C15429	C25H32O8	-1.00	17,21-Dihydroxypregn-4-ene-3,11,20-trione 21-(hydrogensuccinate); 21-(3-Carboxy-1-oxopropoxy)-17-hydroxypregn-4-ene-3,11,20-trione; Cortisone 21-succinate;
6.61_149.0606	0.5	2.58e-02	1.19066	C05581	C9H10O3	5.41	3-Methoxy-4-hydroxyphenylacetaldehyde; (4-Hydroxy-3-methoxyphenyl)acetaldehyde; Homovanillin;	map00350 Tyrosine metabolism; map01100 Metabolic pathways;
6.62_305.1729	2.20304	1.06e-02	1.36259	C14753	C18H26O5	-5.81	beta-Zearalanol; Taleranol;
6.64_431.2773	0.17	1.62e-03	1.61415	C01558	C24H40O5	1.29	Bile salt; Bile acid;	map04975 Fat digestion and absorption; map04977 Vitamin digestion and absorption;
6.65_390.2779	0.16	4.22e-03	1.85248	C11637	C24H38O4	2.25	3alpha,12alpha-Dihydroxy-5beta-chol-6-enoate;
6.79_297.2677	3.39747	1.68e-02	1.68278	C06121	C18H35NO2	3.11	3-Ketosphingosine;
6.79_375.2149	2.17112	9.98e-03	1.09332	C01312	C20H32O5	2.06	Prostaglandin I2; (5Z,13E)-(15S)-6,9alpha-Epoxy-11alpha,15-dihydroxyprosta-5,13-dienoate; Prostacyclin; PGI2; Epoprostenol;	map00590 Arachidonic acid metabolism; map01100 Metabolic pathways; map04024 cAMP signaling pathway; map04080 Neuroactive ligand-receptor interaction; map04270 Vascular smooth muscle contraction; map04370 VEGF signaling pathway; map04611 Platelet activation;
6.84_396.3113	3.77522	4.05e-02	1.82727	C13856	C23H38O4	1.29	2-Arachidonoylglycerol; 2-Arachidonoyl-sn-glycerol; 2-AG;	map04080 Neuroactive ligand-receptor interaction; map04723 Retrograde endocannabinoid signaling;
6.85_363.2163	2.65931	3.63e-02	1.08551	C20852	C19H32O5	6.13	3alpha-Hydroxy-3,5-dihydromonacolin L acid;
6.88_389.2311	3.17256	2.18e-02	1.34773	C15284	C23H32O5	-2.87	6beta,17beta-Dihydroxyandrost-4-en-3-one diacetate; 6beta-Hydroxytestosterone diacetate;
6.94_349.1991	1.89603	1.78e-02	1.00735	C05950	C20H30O6	-4.96	20-COOH-Leukotriene B4; 20-COOH-LTB4; 20-Carboxy-leukotriene B4; 5,12-Dihydroxy-delta5,8,11,14-eicosapolyendioic acid;	map00590 Arachidonic acid metabolism;
6.96_306.1822	1.90638	2.31e-02	1.09713	C14183	C18H26O4	-3.12	Compactin diol lactone; ML-236A;
7.04_282.2584	2.72617	1.54e-02	1.33309	C00712	C18H34O2	8.98	(9Z)-Octadecenoic acid; (Z)-Octadec-9-enoic acid; Oleate; Oleic acid;	map00061 Fatty acid biosynthesis; map01040 Biosynthesis of unsaturated fatty acids;
7.04_299.2828	3.39662	1.55e-02	1.5359	C02934	C18H37NO2	1.17	3-Dehydrosphinganine; 3-Dehydro-D-sphinganine;	map00600 Sphingolipid metabolism; map01100 Metabolic pathways;
7.08_193.1596	3.27053	2.74e-03	1.03071	C14698	C13H20O	4.56	4-n-Heptylphenol; p-Heptylphenol; p-Hydroxyheptylbenzene;
7.08_273.1856	5.66062	2.73e-03	1.72485	C02537	C18H24O2	2.5	Estradiol-17alpha; 17alpha-Estradiol;	map00140 Steroid hormone biosynthesis;
7.11_330.2905	1.87281	1.04e-02	1.32768	C10768	C21H35N3	0.36	(-)-Jamine; Homoormosanine;
7.11_374.3632	2.01037	1.19e-02	1.54769	C03049	C22H44O3	0.96	13-Hydroxydocosanoic acid; 13-Hydroxydocosanoate;
7.11_411.2148	3.15816	2.75e-02	1.19976	C11989	C20H36O6	1.13	8,8a-Deoxyoleandolide;
7.13_433.3421	2.14411	4.45e-02	1.09138	C11455	C29H46O	-4.76	4,4-Dimethyl-5alpha-cholesta-8,14,24-trien-3beta-ol;	map00100 Steroid biosynthesis; map01100 Metabolic pathways;map01130 Biosynthesis of antibiotics
7.14_349.2362	3.00882	3.90e-02	1.07081	C14598	C21H32O4	-3.17	3alpha,17alpha-Dihydroxy-5beta-pregnane-11,20-dione; 17alpha-Hydroxy-11-ketopregnanolone;
7.16_286.3113	2.42455	3.85e-02	1.12212	C01838	C18H36O	3.32	Octadecanal;
7.16_301.2993	2.85628	3.67e-02	1.729	C00836	C18H39NO2	4.02	Sphinganine; Dihydrosphingosine; 2-Amino-1,3-dihydroxyoctadecane;	map00600 Sphingolipid metabolism; map01100 Metabolic pathways; map04071 Sphingolipid signaling pathway;
7.16_403.2844	0.49	4.57e-02	1.00174	C06861	C21H31N5O2	7.27	Buspirone;
7.16_453.2171	2.16107	6.73e-03	1.28317	C17439	C20H38O7P2	1.3	Dihydrogeranylgeranyl diphosphate;
7.18_285.2228	2.95553	1.17e-03	1.37442	C12083	C20H30O2	5.01	(5Z,7E,9E,14Z,17Z)-Eicosapentaenoic acid; (5Z,7E,9E,14Z,17Z)-Eicosapentaenoate;	map04750 Inflammatory mediator regulation of TRP channels;
7.18_445.2358	0.315654	1.71e-03	1.18265	C01292	C24H38O5	1.70	3alpha,7alpha-Dihydroxy-12-oxo-5beta-cholanate;
7.18_530.2563	0.31	2.03e-03	1.04359	C08883	C29H38O9	8.84	Uscharidin;
7.18_566.2658	0.27	9.85e-04	1.28978	C18069	C34H37N3O6	1.40	N1,N5,N10-Tricoumaroyl spermidine;
7.20_356.3530	1.82568	4.63e-03	1.20687	C08316	C22H42O2	2.08	Erucic acid; (13Z)-Docosenoic acid; cis-13-Docosenoic acid;	map01040 Biosynthesis of unsaturated fatty acids;
7.26_257.1912	7.02198	1.34e-02	1.35856	C15257	C18H26O2	4.42	17beta-Hydroxyestr-5(10)-en-3-one; Prenortestosterone;
7.26_275.2016	6.291	1.75e-03	1.68478	C16320	C18H28O3	3.66	Colnelenic acid; (8E)-9-[(1E,3Z,6Z)-Nona-1,3,6-trien-1-yloxy]non-8-enoate;	map00592 alpha-Linolenic acid metabolism;
7.26_468.3696	0.18	4.98e-03	2.15656	C04722	C27H46O5	2.74	3alpha,7alpha,12alpha-Trihydroxy-5beta-cholestanoate; 3alpha,7alpha,12alpha-Trihydroxy-5beta-cholestan-26-oate; 3alpha,7alpha,12alpha-Trihydroxy-5beta-cholestanate;	map00120 Primary bile acid biosynthesis; map01100 Metabolic pathways;
7.31_297.1844	2.64659	1.65e-02	1.13417	C16678	C20H26O3	-1.67	all-trans-4-Oxoretinoic acid;	map00830 Retinol metabolism; map01100 Metabolic pathways;
7.33_363.2166	1.93897	1.17e-03	1.05833	C05469	C21H30O5	0.12	17alpha,21-Dihydroxy-5beta-pregnane-3,11,20-trione; 5beta-Pregnane-17alpha,21-diol-3,11,20-trione; 4,5beta-Dihydrocortisone;	map00140 Steroid hormone biosynthesis;
7.42_358.3683	1.92203	8.90e-03	1.28712	C08281	C22H44O2	0.92	Docosanoic acid; Docosanoate; Behenic acid;	map01040 Biosynthesis of unsaturated fatty acids;
7.42_402.3947	2.2989	8.11e-03	1.64579	C17873	C24H48O3	1.49	2-Hydroxytetracosanoic acid;
7.53_357.2817	0.19	2.74e-03	2.05325	C15345	C24H38O3	7.85	3beta-[(Tetrahydro-2H-pyran-2-yl)oxy]androst-5-en-17beta-ol; Androst-5-ene-3beta,17beta-diol 3-tetrahydropyranyl ether;
7.55_340.2852	2.09652	8.16e-03	1.10476	C12144	C18H39NO3	9.27	Phytosphingosine; 4-D-Hydroxysphinganine;	map00600 Sphingolipid metabolism; map01100 Metabolic pathways;
7.61_515.2752	1.94524	2.10e-02	1.09851	C08185	C30H41FO7	-9.64	Triamcinolone hexacetonide;
7.67_218.1678	2.41727	4.22e-03	1.23208	C09938	C15H22O	3.44	(+)-8-Hydroxycalamenene;
7.67_997.6450	0.3	4.61e-03	1.7215	C20642	C49H100O14P2	-3.18	1-Archaetidyl-1D-myo-inositol 3-phosphate; 1-Saturated archaetidyl-1D-myo-inositol 3-phosphate; Archaetidylinositol phosphate;
7.77_558.4379	3.33104	4.76e-02	1.66534	C07553	C34H57N2O4+	-2.17	Vecuronium;
7.78_291.1442	0.54	2.58e-02	1.24635	C05010	C12H20N4O3	5.44	Histidylleucine; N-L-Histidyl-L-leucin; His-Leu;
7.89_274.1258	2.46818	2.74e-03	1.50848	C18760	C14H21NOS	8.75	Prosulfocarb;
7.89_276.1283	2.75733	4.52e-04	1.59193	C04663	C9H14N4O5	-7.64	Acadesine; AICA riboside; 5-Amino-1-beta-D-ribofuranosylimidazole-4-carboxamide; 5-Aminoimidazole-4-carboxamide-1-beta-D-ribofuranoside;
7.91_451.2708	3.55496	2.35e-05	2.22196	C20586	C28H37NO4	-3.17	Terpendole G;
7.94_240.1006	0.51	2.08e-02	1.20826	C02291	C7H14N2O4S	-2.97	L-Cystathionine;	map00260 Glycine, serine and threonine metabolism; map00270 Cysteine and methionine metabolism; map01100 Metabolic pathways; map01230 Biosynthesis of amino acids;
7.95_361.2745	0.51	1.54e-02	1.3446	C15331	C23H36O3	2.13	17beta-Hydroxy-6beta-methyl-5alpha-androstan-3-one propionate; 4,5alpha-Dihydro-6beta-methyltestosterone propionate;
8.01_284.2154	3.11961	3.59e-04	1.95619	C13037	C20H28O	4.91	Lynestrenol;
8.01_304.1492	0.51	8.83e-03	1.15157	C17583	C12H23N3O7	-3.44	6'-Dehydro-6'-oxoparomamine; 6'-Dehydroparomamine; 6'-Oxoparomamine;	map00524 Butirosin and neomycin biosynthesis;
8.01_313.1364	0.47	9.19e-03	1.33935	C15073	C20H23ClO2	3.09	17alpha-Chloroethynylestradiol; 21-Chloro-19-nor-17alpha-pregna-1,3,5(10)-trien-20-yne-3,17-diol;
8.01_440.2761	1.84604	1.96e-03	1.19385	C15061	C27H34O4	-8.06	2,2-Dibutyl-3-(4-methoxyphenyl)-4-methyl-2H-1-benzopyran-7-ol acetate;
8.01_450.2519	2.03789	1.07e-02	1.56062	C00397	C18H37N5O9	-8.34	Tobramycin; Nebramycin factir 6; 3'-Deoxykanamycin B;
8.01_567.3321	0.33	1.85e-02	1.53079	C20596	C37H45NO4	-4.88	Penitrem D;
8.01_587.3124	0.34	1.35e-02	1.45659	C19898	C36H44N4O	-4.06	Manzamine A; Keramamine A;
8.01_658.3108	0.38	8.19e-03	1.3356	C17587	C25H47N5O15	-5.12	2'''-N-Acetyl-6'''-deamino-6'''-hydroxyneomycin C;	map00524 Butirosin and neomycin biosynthesis;
8.03_292.1491	0.42	1.60e-03	1.74374	C20915	C11H21N3O6	-4.03	C20915; Tabtoxin biosynthesis intermediate 5;
8.03_299.1368	0.59	9.47e-04	1.023	C16997	C17H15NO3	-7.80	Michelalbine;
8.03_628.2936	0.42	6.31e-03	1.44987	C07709	C33H34N6O6	9.44	Candesartan cilexetil;
8.06_481.2404	2.12514	8.06e-04	1.3782	C06832	C28H31FN4O	6.60	Astemizole;
8.07_518.2909	2.2109	8.06e-03	1.06082	C17009	C25H43NO10	-9.86	Mycalamide B;
8.12_258.1992	2.61228	2.77e-03	1.18567	C20696	C18H26O	3.26	13-Apo-beta-carotenone;
8.19_348.2903	1.92166	1.20e-03	1.20702	C11695	C22H37NO2	1.84	Anandamide; Arachidonylethanolamide; N-(5Z,8Z,11Z,14Z-icosatetraenoyl)-ethanolamide; AEA;	map04080 Neuroactive ligand-receptor interaction; map04723 Retrograde endocannabinoid signaling; map04750 Inflammatory mediator regulation of TRP channels;
8.19_682.3655	1.82393	1.07e-02	1.22776	C10008	C39H49N5O7	8.00	Lasiodine A;
8.21_318.2185	0.62	8.28e-04	1.00797	C08067	C23H27N	-9.72	Butenafine;
8.21_338.1794	0.616444	8.28e-04	1.06192	C02993	C15H23N5O4	-8.62	Kyotorphin; L-Tyrosyl-L-arginine;
8.21_380.1914	0.54	1.09e-03	1.08561	C01341	C15H27N5O5	2.59	E-64; Proteinase inhibitor E 64;
8.22_297.1472	2.36378	2.59e-05	1.525	C18131	C17H22O3	3.82	Geranyl-hydroxybenzoate;	map00130 Ubiquinone and other terpenoid-quinone biosynthesis;
8.22_336.1847	0.62	1.13e-03	1.06969	C07043	C18H26ClN3O	2.81	Hydroxychloroquine;
8.22_420.7845	0.33	7.06e-03	1.52691	C18146	C10H4Cl8O	0.48	Oxychlordane;
8.22_459.2495	2.18298	6.49e-05	1.26193	C03805	C21H41O7P	2.85	Stearoylglycerone phosphate;
8.22_602.2880	2.05679	6.59e-03	1.53472	C20564	C32H41N3O7	7.51	Fumitremorgin A;
8.24_454.2356	4.35077	1.74e-04	2.40382	C07241	C25H37NO4	0.42	Salmeterol;
8.24_618.2493	4.77979	1.95e-02	2.6889	C12408	C31H36O12	-8.67	100-2;
8.24_949.6270	5.92383	6.91e-04	2.34843	C15954	C59H90O7	-5.26	Thermocryptoxanthin-13;
8.26_276.1252	3.45266	8.71e-06	2.21637	C14115	C15H14O4	8.55	2-Naphtylmethylsuccinic acid; Naphthyl-2-methyl-succinic acid;	map01220 Degradation of aromatic compounds;
8.26_449.1991	3.19182	2.69e-04	1.96397	C02079	C28H26N4O3	4.17	Staurosporine; STS;
8.26_477.1939	4.38174	4.60e-04	2.43095	C17428	C21H32O12	-5.84	Kanokoside A;
8.35_308.2961	13.1222	2.80e-03	3.74188	C20792	C20H39NO2	4.09	Oleoylethanolamide; OEA;	map04024 cAMP signaling pathway;
8.35_339.2903	3.75844	5.54e-05	2.17277	C19426	C21H38O3	2.81	Glycidyl oleate;
8.35_475.2178	2.44083	3.67e-05	1.86429	C20813	C20H31N3O7S	-9.49	OA-6129 A;
8.35_480.2497	4.67649	3.43e-06	2.51308	C20630	C27H33N3O5	0.92	Fumitremorgin B;
8.35_501.2830	2.74364	5.30e-05	1.89917	C06999	C32H39NO4	-9.80	Fexofenadine; 4-(1-Hydroxy-4-(4-(hydroxydiphenylmethyl)-1-piperidinyl)butyl)-alpha,alpha-dimethylbenzeneacetic acid;	map04976 Bile secretion;
8.35_503.2087	1.84091	1.55e-02	1.69321	C11134	C25H36O8	9.77	Testosterone glucuronide; Testosterone 17beta-(beta-D-glucuronide);	map00140 Steroid hormone biosynthesis;
8.35_564.2737	4.8071	9.57e-05	2.51793	C12099	C31H34N2O7	6.08	Asukamycin;
8.37_299.2831	1.6766	1.32e-03	1.11385	C00319	C18H37NO2	2.13	Sphingosine; Sphingenine; Sphingoid; Sphing-4-enine;	map00600 Sphingolipid metabolism; map01100 Metabolic pathways; map04071 Sphingolipid signaling pathway;
8.40_530.3240	2.54727	8.10e-05	1.31438	C20025	C32H45NO4	-0.15	Gymnodimine; Gymnodimine A; GYM A;
8.41_502.3274	4.06502	1.51e-04	2.11353	C13764	C28H40N2O5	-0.22	Gallopamil;
8.43_269.1256	1.86504	2.53e-03	1.23585	C02267	C11H16N4O4	4.25	Deoxycoformycin; Pentostatin;
8.43_538.2459	2.46353	1.62e-02	1.05171	C19990	C25H41NO9	9.14	Aconine; Jesaconine;
8.46_467.3005	2.57884	1.88e-04	1.83466	C08007	C29H41NO4	-6.49	Buprenorphine;
8.46_511.2866	2.5904	1.28e-04	1.52702	C12153	C26H39NO6S	6.03	Epothilone A;
8.49_181.1298	0.6	2.41e-04	1.06863	C19277	C8H18N2O	-8.66	N-Nitrosodi-n-butylamine; N,N-Dibutylnitrosoamine;
8.52_180.1532	0.67	3.99e-03	1.0195	C08375	C12H20O	9.95	(3Z,6Z,9Z)-3,6,9-Dodecatrien-1-ol; (Z,Z,Z)-3,6,9-Dodecatrien-1-ol;
8.53_536.3602	2.24934	8.10e-05	1.55368	C08798	C30H46O7	3.96	Cucurbitacin F;
8.58_443.1217	0.43	3.71e-04	1.01583	C10511	C25H24O5	-9.53	Osajin;
8.58_824.4997	3.74077	3.16e-03	2.56237	C16907	C47H71NO12	6.35	Azaspiracid;
8.59_423.2240	1.89363	5.00e-03	1.43819	C17614	C19H34O10	3.72	1-Octen-3-ol-3-o-beta-D-xylopyranosyl(1->6)-beta-D-glucopyranoside;
8.61_419.1218	0.44	2.54e-04	1.2186	C15050	C23H24O5	-9.69	2,2-Dimethyl-3-[4-(acetyloxy)phenyl]-4-ethyl-2H-1-benzopyran-7-ol acetate; 4-Ethyl-3-(p-hydroxyphenyl)-2,2-dimethyl-2H-1-benzopyran-7-ol diacetate;
8.64_282.1646	2.20458	1.82e-04	1.42307	C11767	C14H23N3OS	4.17	Xanomeline;
8.66_272.1565	2.3434	3.00e-03	1.49342	C14278	C21H20	0.06	1,1,2-Triphenylpropane;
8.66_341.3058	4.94131	9.21e-04	2.44115	C19427	C21H40O3	2.29	Glycidyl stearate;
8.66_518.3012	2.37303	2.86e-03	1.45548	C09941	C33H42O5	-3.83	Hypercalin B;
8.66_533.3102	4.19582	5.30e-05	2.195	C05468	C27H48O8S	-7.66	5beta-Cyprinolsulfate;	map00120 Primary bile acid biosynthesis;
8.67_477.2308	2.12641	5.72e-03	1.37841	C07080	C29H33ClN2O2	0.95	Loperamide;
8.74_509.3440	1.61459	3.97e-03	1.09736	C19902	C29H48O7	-6.39	Contignasterol;
8.77_383.3154	1.45904	3.82e-02	1.00091	C03199	C23H44O5	-0.38	1,2-Didecanoylglycerol; 1,2-Didecanoyl-sn-glycerol;
8.77_629.3628	2.51205	3.91e-03	1.55353	C08920	C36H54O10	-8.62	Abrusoside A;
8.78_651.5551	5.80856	3.42e-04	1.61163	C05812	C47H72O2	7.76	2-Octaprenyl-6-methoxyphenol;	map00130 Ubiquinone and other terpenoid-quinone biosynthesis;
8.79_327.3147	1.45842	4.96e-02	1.04161	C13914	C20H41NO2	2.95	N,N-Dimethylsphing-4-enine;
8.79_518.3293	1.54933	9.48e-04	1.13205	C11758	C26H44O9	-6.18	Mupirocin;
8.79_716.4495	2.79582	5.43e-03	1.73393	C18139	C12H3Br7O	-6.34	2,2',3,3',4',5,6'-Heptabromodiphenyl ether; 1,2,3,5-Tetrabromo-4-(2,3,5-tribromophenoxy)-benzene; BDE 175;
8.79_939.6168	2.51599	2.37e-03	1.41932	C13867	C57H88O8	6.36	1,2-Di-(9Z,12Z,15Z-octadecatrienoyl)-3-(8-(2E,4Z-decadienoyloxy)-5,6-octadienoyl)-sn-glycerol;
8.84_316.2980	4.1881	1.40e-04	1.5569	C13859	C19H40O3	0.88	1-O-Hexadecyl-sn-glycerol; 1-O-Hexadecylglycerol; Chimyl alcohol; Glycerol hexadecyl ether;
8.84_745.4959	3.98748	2.63e-03	1.8186	C15834	C43H70O11	9.62	Narasin B; A28086B;
8.84_777.5160	1.86647	1.26e-02	1.05838	C11314	C44H72O11	1.60	Oligomycin D; Rutamycin;
8.87_941.6589	1.98764	2.57e-02	1.22512	C04150	C56H93O9P	-4.39	beta-D-Mannosylphosphodecaprenol;
8.91_342.3131	4.46559	3.88e-05	1.5109	C13860	C21H42O3	-0.82	1-O-Octadec-9-enyl glycerol; Selachyl alcohol;
8.96_401.3418	3.3517	5.75e-03	2.12506	C05455	C27H44O2	0.88	7alpha-Hydroxycholest-4-en-3-one;	map00120 Primary bile acid biosynthesis; map01100 Metabolic pathways;
9.01_457.2163	1.57657	3.39e-02	1.01059	C05730	C17H34N6O5S	-9.40	Glutathionylspermidine; N1-(gamma-L-Glutamyl-L-cysteinyl-glycyl)-spermidine;	map00480 Glutathione metabolism; map01100 Metabolic pathways;
9.02_670.2440	0.57	3.62e-02	1.06676	C01266	C21H42N7O14P	3.23	3'-Deoxydihydrostreptomycin 6-phosphate;
9.07_384.3401	2.59237	8.83e-03	1.32969	C05443	C27H44O	2.19	Vitamin D3; Cholecalciferol; Calciol;	map00100 Steroid biosynthesis; map01100 Metabolic pathways; map04977 Vitamin digestion and absorption; map05323 Rheumatoid arthritis;
9.19_615.4599	2.9555	7.74e-04	1.78655	C20623	C39H68O2S2	-4.54	Caldariellaquinol;
9.19_623.3806	1.51141	1.68e-02	1.16046	C16282	C40H56O3	-9.49	Caloxanthin;
9.19_804.5466	2.22973	1.07e-02	1.74341	C20466	C46H78NO8P	-8.91	2,3-Bis-O-(geranylgeranyl)-sn-glycero-1-phospho-L-serine;	map00564 Glycerophospholipid metabolism;
9.22_344.3298	4.33297	9.57e-05	1.63773	C13858	C21H44O3	2.31	1-O-Octadecyl-sn-glycerol; 1-O-Octadecylglycerol; Batyl alcohol; Glycerol octadecyl ether;
9.25_385.2452	2.48888	8.11e-03	1.83646	C07852	C23H29NO3	-9.18	Propiverine;
9.29_744.2630	0.44	3.79e-02	1.02867	C16875	C39H43N3O11S	5.87	Trabectedin; Ecteinascidin 743;
9.32_431.2572	1.50361	2.80e-03	1.02155	C04483	C24H40O4	3.52	Deoxycholic acid; Deoxycholate; 3alpha,12alpha-Dihydroxy-5beta-cholanate; 3alpha,12alpha-Dihydroxy-5beta-cholanic acid;	map04976 Bile secretion;
9.46_402.3511	2.06357	8.52e-03	1.25995	C03594	C27H46O2	3.30	7alpha-Hydroxycholesterol; Cholest-5-ene-3beta,7alpha-diol;	map00120 Primary bile acid biosynthesis; map01100 Metabolic pathways;
9.66_469.3208	1.83743	2.00e-03	1.05629	C10821	C27H46N2O2	4.06	Solanocapsine;
9.68_585.4128	2.1548	1.04e-02	1.23861	C12001	C31H53NO8	3.30	5-O-beta-D-Mycaminosyltylactone;
9.73_402.3509	5.90312	5.44e-05	2.42118	C05500	C27H46O2	2.69	20alpha-Hydroxycholesterol; 20-Hydroxycholesterol;	map00140 Steroid hormone biosynthesis; map01100 Metabolic pathways;
9.74_1026.3209	0.46	1.55e-02	1.18349	C16163	C39H62N7O17P3S	0.07	(6Z,9Z,12Z,15Z)-Octadecatetraenoyl-CoA; Stearidonoyl-CoA;	map01040 Biosynthesis of unsaturated fatty acids; map01212 Fatty acid metabolism;
9.85_290.9268	0.63	4.05e-04	1.00009	C14360	C12H6Cl4	-9.79	2,2',4,5-Tetrachlorobiphenyl; PCB 48;
9.88_383.3307	2.00226	2.49e-03	1.2093	C05107	C27H42O	-0.40	7-Dehydrodesmosterol; Cholesta-5,7,24-triene-3beta-ol;	map00100 Steroid biosynthesis; map01100 Metabolic pathways;
9.91_509.4800	9.63939	4.97e-04	3.00923	C13916	C32H63NO3	-1.49	N-(Tetradecanoyl)-sphing-4-enine;
9.93_450.3017	1.63315	1.21e-03	1.13207	C17988	C18H36N6O6	-3.98	Istamycin A2;
9.96_446.7617	2.6243	1.25e-02	1.74662	C15213	C12H3Cl7O	-4.38	2,2',3',4,4',5,5'-Heptachloro-3-biphenylol;
9.97_423.3815	3.56481	4.39e-02	1.55899	C19805	C22H47NO5	5.48	Aminopentol; AP1;
9.99_385.3478	4.08852	9.62e-03	1.84777	C05451	C27H46O2	3.20	7alpha-Hydroxy-5beta-cholestan-3-one; 5beta-Cholestan-7alpha-ol-3-one;	map00120 Primary bile acid biosynthesis; map01100 Metabolic pathways;
9.99_489.3467	0.31	6.28e-04	1.85043	C07463	C32H41NO2	-1.79	Terfenadine;
9.99_802.5371	4.09664	3.36e-03	2.35713	C20779	C42H72O13	7.63	Ginsenoside F2;
ESI-
10.03_365.3409	6.24641	5.38e-04	2.38146	C08323	C24H46O2	-4.40	(15Z)-Tetracosenoic acid; Nervonic acid; (Z)-15-Tetracosenoic acid;	map01040 Biosynthesis of unsaturated fatty acids;
10.03_433.3294	5.84602	1.08e-02	2.57073	C01301	C27H46O4	-6.71	3alpha,7alpha,12alpha-Trihydroxy-5beta-cholestan-26-al;	map00120 Primary bile acid biosynthesis; map01100 Metabolic pathways;
10.03_495.3011	2.80886	3.61e-02	1.44575	C08834	C27H44O8	9.54	Polypodine B;
10.06_786.5090	3.06808	2.49e-03	1.48166	C11607	C41H69N7O8	-5.72	N-Acetyl-leu-leu-leu-leu-leu-tyr-amide; NAc-L5Y-amide;
10.17_313.0777	0.49	1.69e-02	1.04157	C19500	C22H14	-4.47	Picene; Benzo[a]chrysene;
10.29_924.5014	0.54	1.76e-02	1.01354	C06572	C47H75NO17	5.62	Nystatin;
10.35_1056.5255	1.65325	4.70e-02	1.17238	C18059	C52H85N3O13P2	0.35	CDP-2,3-bis-O-(geranylgeranyl)-sn-glycerol;	map00564 Glycerophospholipid metabolism;
10.38_540.3101	2.54263	7.60e-03	1.65238	C15684	C29H47NO6	0.71	Mycinamicin VIII;
10.45_299.9551	0.56	1.34e-02	1.05254	C13127	C10H8BrN3O	2.46	Bropirimine;
10.49_213.0544	0.44	2.12e-03	1.34469	C08455	C13H10O3	-5.98	Mycosinol; (2E)-2-Hexa-2,4-diynylidene-1,6-dioxaspiro(4.4)nona-3,7-dien-9-ol;
10.59_716.5257	3.0736	2.25e-02	1.54732	C13877	C39H76NO8P	2.90	1-Hexadecanoyl-2-(9Z-octadecenoyl)-sn-glycero-3-phosphoethanolamine;
10.62_1058.5558	1.93489	2.95e-02	1.59301	C00306	C50H73N15O11	1.54	Bradykinin;	map04022 cGMP-PKG signaling pathway; map04071 Sphingolipid signaling pathway; map04080 Neuroactive ligand-receptor interaction; map04610 Complement and coagulation cascades; map04750 Inflammatory mediator regulation of TRP channels; map04810 Regulation of actin cytoskeleton; map05142 Chagas disease (American trypanosomiasis); map05143 African trypanosomiasis; map05200 Pathways in cancer;
10.62_400.1565	2.24259	1.22e-02	1.54626	C10396	C19H27NO6	9.02	Senkirkine;
10.62_430.1887	2.48427	1.86e-02	1.74174	C19243	C23H29NO7	3.63	Fusarin C;
10.64_442.2391	1.77021	1.99e-02	1.15578	C08666	C23H37NO5	6.17	Cammaconine; Columbiananine;
10.71_681.5298	7.33641	7.06e-03	2.07961	C05809	C47H70O3	6.78	3-Octaprenyl-4-hydroxybenzoate; 4-Hydroxy-3-octaprenylbenzoate;	map00130 Ubiquinone and other terpenoid-quinone biosynthesis;
10.80_249.1515	0.404889	7.07e-03	1.36756	C13456	C15H22O3	7.45	Abscisic alcohol;
10.83_268.9529	0.6	2.75e-02	1.03533	C17382	C6H10FeO6	3.63	Ferrous lactate;
6.66_407.2769	0.25	1.45e-02	1.59665	C00695	C24H40O5	-8.36	Cholic acid; Cholate; 3alpha,7alpha,12alpha-Trihydroxy-5beta-cholanate; 3alpha,7alpha,12alpha-Trihydroxy-5beta-cholanic acid;	map00120 Primary bile acid biosynthesis; map01100 Metabolic pathways; map04976 Bile secretion;
6.66_475.2670	0.13	6.04e-03	1.79387	C14990	C27H40O7	-6.46	Cyclic-3,20-bis(1,2-ethanediyl acetal)-11alpha-(acetyloxy)-5alpha,6alpha-epoxypregnane-3,20-dione;
6.71_411.2386	6.38306	4.59e-02	1.56468	C09103	C22H36O7	-0.51	Grayanotoxin I; Rhodotoxine;
7.20_553.2497	0.31	6.95e-03	1.24577	C08785	C31H38O9	9.68	Toonacilin;
7.20_566.2190	0.19	4.04e-03	1.44404	C10597	C28H37NO9	5.13	Harringtonine;
7.22_337.2367	0.25	2.84e-02	1.41924	C14774	C20H34O4	-5.21	11,12-DHET; (5Z,8Z,14Z)-11,12-Dihydroxyeicosa-5,8,14-trienoic acid; (5Z,8Z,14Z)-11,12-Dihydroxyicosa-5,8,14-trienoic acid;	map00590 Arachidonic acid metabolism; map01100 Metabolic pathways; map04726 Serotonergic synapse;
7.35_537.2888	0.17	6.09e-03	2.3117	C15622	C29H46N2O3S	-6.98	GW 7647;
7.41_257.1530	46.3467	1.76e-02	1.82392	C20044	C17H22O2	-6.45	Enanthotoxin; Oenanthotoxin;
7.51_361.2004	2.69926	4.98e-02	1.17449	C05473	C21H30O5	-4.53	11beta,21-Dihydroxy-3,20-oxo-5beta-pregnan-18-al;	map00140 Steroid hormone biosynthesis;
7.53_427.2847	4.32194	2.44e-02	1.73207	C08148	C27H40O4	-1.63	Hydroxyprogesterone caproate; Primolut depot; 17alpha-Caproyloxypregn-4-ene-3,20-dione;
7.55_493.1718	2.59482	2.17e-02	1.20662	C09783	C24H30O11	0.54	Harpagoside;
7.58_341.2107	1.95042	1.23e-02	1.08421	C15301	C22H30O3	-4.54	2alpha-Methylpregn-4-ene-3,11,20-trione; 2alpha-Methyl-11-oxoprogesterone;
7.65_317.2105	2.90696	8.21e-03	1.12985	C04577	C20H30O3	-5.48	15-OxoETE; (5Z,8Z,11Z,13E)-15-Oxoicosa-5,8,11,13-tetraenoic acid; 15-Oxo-5,8,11-cis-13-trans-eicosatetraenoate; 15-Oxo-5,8,11-cis-13-trans-icosatetraenoate;	map00590 Arachidonic acid metabolism;
7.67_659.4218	1.88683	2.82e-02	1.16751	C09153	C38H60O9	8.09	12-O-Palmitoyl-16-hydroxyphorbol 13-acetate; Croton factor F1;
7.70_163.1112	5.07091	4.99e-02	1.08648	C08490	C11H16O	-9.90	Jasmone; cis-Jasmone;
7.70_565.2753	2.31854	1.09e-02	1.03339	C17618	C28H42N4O6	-8.52	Kukoamine D;
7.71_243.1945	0.34	3.14e-03	1.43189	C13790	C14H28O3	-8.34	2S-Hydroxytetradecanoic acid; 2S-Hydroxytetradecanoate;
7.73_539.1562	1.92065	4.88e-02	1.14588	C17781	C28H28O11	0.58	2''-o-p-Coumaroylaloesin;
7.75_363.2149	2.64559	9.53e-03	1.35461	C05474	C21H32O5	-7.73	3alpha,11beta,21-Trihydroxy-20-oxo-5beta-pregnan-18-al;	map00140 Steroid hormone biosynthesis;
7.77_223.1694	0.473493	2.81e-02	1.76169	C21004	C9H24N4	-0.69	Norspermine; N,N'-Bis(3-aminopropyl)-1,3-propanediamine;
7.77_580.2882	6.62584	1.39e-03	1.55297	C02856	C23H43N5O12	8.02	N3'-Acetylapramycin;
7.80_424.2468	3.60166	1.34e-04	2.04662	C11794	C26H35NO4	-5.92	Diprenorphine;
7.84_277.2167	3.48541	2.01e-03	1.86241	C06427	C18H30O2	-2.02	(9Z,12Z,15Z)-Octadecatrienoic acid; alpha-Linolenic acid; 9,12,15-Octadecatrienoic acid; Linolenate; alpha-Linolenate;	map00592 alpha-Linolenic acid metabolism; map01040 Biosynthesis of unsaturated fatty acids; map01100 Metabolic pathways;
7.89_205.1221	3.06207	4.57e-02	1.45351	C02185	C13H18O2	-6.42	Plastoquinol-1;	map01100 Metabolic pathways;
7.89_475.2025	3.33467	3.05e-03	1.66808	C07965	C22H36N2O5S	-3.10	Tirofiban;
7.89_549.2058	10.0976	9.75e-04	2.77719	C07710	C33H30N4O2	-0.85	Telmisartan;
7.90_606.3035	4.13224	4.27e-04	1.80437	C11308	C31H41N7O6	-1.71	Chymostatin;
7.92_253.2160	7.32271	1.18e-04	2.35718	C08362	C16H30O2	-5.24	(9Z)-Hexadecenoic acid; Palmitoleic acid; cis-9-Hexadecenoic acid;	map00061 Fatty acid biosynthesis;
7.98_777.2407	0.51	4.95e-02	1.0798	C10543	C34H46O18	3.90	Acanthoside D; (-)-Syringaresinol di-beta-D-glucoside;
8.02_593.3538	17.4291	1.08e-04	3.10245	C16147	C36H50O7	9.11	Glycosyl-4,4'-diaponeurosporenoate;
8.03_438.2625	6.95272	1.91e-04	2.59031	C16747	C17H37N7O4	6.04	Spergualin;
8.03_698.2782	0.42	4.40e-02	1.24887	C18635	C36H45NO13	-5.20	Aclacinomycin S; L-2-Deoxyfucosyl-L-rhodosaminyl-aklavinone;
8.03_860.2822	0.38	1.23e-02	1.40668	C20140	C38H52ClN3O15	5.01	4''-O-Carbamoyl ansamitocinoside P-3; ACGP-3;
8.05_674.2782	0.5	3.97e-02	1.01061	C12246	C35H45NO10	7.03	Protorifamycin I;
8.05_724.3066	0.33	1.14e-02	1.73402	C08704	C36H51NO12	-5.76	Pseudoaconitine;
8.09_544.2655	1.90132	1.29e-02	1.25126	C10807	C27H43NO8	-5.46	Germine;
8.09_560.2324	2.08269	4.85e-02	1.37423	C03154	C20H39N5O11	-3.09	N6'-Acetylkanamycin-B;
8.10_612.2570	2.39965	2.23e-03	1.39862	C07597	C25H45FeN6O8	-0.92	Ferroxamine; Ferrioxamine; Desferal-iron(III);
8.18_198.9299	0.49	1.88e-02	1.42358	C07517	C3H4Cl2F2O	-1.41	Methoxyflurane;
8.18_333.2453	2.10447	2.61e-02	1.02559	C13713	C21H34O3	5.28	Allotetrahydrodeoxycorticosterone; 5alpha-THDOC; 3alpha,21-Dihydroxy-5alpha-pregnan-20-one;	map00140 Steroid hormone biosynthesis;
8.19_357.2413	16.3035	3.26e-02	1.85495	C14931	C23H34O3	-6.12	16-Butyl-3-methoxy-estra-1,3,5(10)-triene-16beta,17beta-diol;
8.19_594.2824	1.72955	4.85e-02	1.03133	C10280	C31H45NO8	-2.66	Auriculine;
8.20_384.2536	2.39741	4.85e-04	1.36961	C12056	C19H35N3O5	8.43	Actinonin;
8.20_414.8877	0.56	8.18e-03	1.06182	C06645	C14H8Cl4O4	1.77	6-Oxo-2-hydroxy-7-(4'-chlorophenyl)-3,8,8-trichloroocta-2E,4E,7E-trienoate;
8.24_557.3215	4.68807	2.69e-03	1.70432	C03916	C26H53NO7P+	-7.33	1-Oleoylglycerophosphocholine; 1-Oleoyl-sn-glycero-3-phosphocholine;
8.24_694.2624	4.14314	2.49e-03	2.14478	C14053	C32H45N5O8S	-8.92	9,10-Dihydroergocornine methanesulfonate;
8.25_624.2900	3.02785	2.19e-02	2.08631	C02166	C30H47N3O9S	-9.67	Leukotriene C4; LTC4;	map00590 Arachidonic acid metabolism; map01100 Metabolic pathways; map04080 Neuroactive ligand-receptor interaction; map04664 Fc epsilon RI signaling pathway; map04726 Serotonergic synapse; map04976 Bile secretion; map05310 Asthma;
8.25_626.2754	7.51096	4.23e-04	2.605	C07956	C32H44F3N3O2S	-7.79	Fluphenazine depot; Fluphenazine decanoate; Prolixin decanoate;
8.28_423.2741	5.41137	1.67e-03	1.52628	C17651	C24H40O6	-2.67	alpha-Phocaecholic acid; 3alpha,7alpha,12alpha,23R-Tetrahydroxycholanic acid;
8.28_520.2650	4.75416	3.94e-04	2.36118	C20741	C25H43NO8	-6.72	Novamethymycin;
8.28_597.2059	5.35275	2.64e-03	2.7625	C15659	C28H38N2O8S	2.93	TMC 126; UIC 94003;
8.31_194.9235	0.56	6.38e-03	1.06783	C02677	C2H6Te	5.52	Dimethyl telluride;
8.31_395.2983	5.17006	4.88e-03	1.58207	C14156	C27H40O2	6.99	delta-Tocotrienol;	map00130 Ubiquinone and other terpenoid-quinone biosynthesis;
8.34_696.3059	2.58704	5.39e-03	1.49833	C12044	C37H47NO12	4.83	Rifamycin; Rifamycin SV;
8.35_313.2179	1.74234	8.35e-03	1.00045	C00410	C21H30O2	1.89	Progesterone; 4-Pregnene-3,20-dione;	map00140 Steroid hormone biosynthesis; map01100 Metabolic pathways; map04114 Oocyte meiosis; map04913 Ovarian steroidogenesis; map04914 Progesterone-mediated oocyte maturation; map04917 Prolactin signaling pathway; map04925 Aldosterone synthesis and secretion; map05200 Pathways in cancer; map05215 Prostate cancer;
8.35_325.2153	2.02164	7.69e-03	1.36034	C15190	C22H30O2	-6.20	12alpha-Methylpregna-4,9(11)-diene-3,20-dione;
8.35_393.2038	1.6128	4.41e-02	1.13836	C09760	C25H30O4	-8.57	Kazinol A;
8.35_631.3509	4.0143	2.22e-02	2.4148	C08580	C40H52O4	-8.43	Astaxanthin;
8.35_720.2826	2.66339	3.34e-03	1.56162	C03170	C27H47N9O10S2	1.62	Trypanothione disulfide; Oxidized trypanothione;	map00480 Glutathione metabolism; map01100 Metabolic pathways;
8.37_356.1297	2.28684	8.24e-03	1.31196	C14917	C20H23NO3S	-8.19	9-Thiocyanato-androst-4-ene-3,11,17-trione;
8.37_562.2469	5.28287	1.52e-04	2.4849	C03642	C26H45NO8S2	-7.92	Taurolithocholate sulfate; 3alpha-Sulfatolithocholyltaurine; Taurolithocholic acid 3-sulfate;	map04976 Bile secretion;
8.37_579.0987	0.47	1.48e-02	1.24292	C15624	C28H28Cl3FN2O4	-6.65	GW 2433;
8.37_608.2533	5.43514	1.34e-04	2.45218	C03183	C28H39N5O8	7.03	Z-Gly-Pro-Leu-Gly-Pro; Carbobenzoxyglycyl-prolyl-leucyl-glycyl-proline; N-[(Phenylmethoxy)carbonyl]glycyl-L-prolyl-L-leucylglycyl-L-proline;
8.37_632.2320	4.49227	2.02e-02	2.3923	C17571	C21H39N7O13	3.39	5'-Hydroxystreptomycin;
8.37_682.2572	6.03726	2.42e-03	2.62099	C08663	C33H45NO12	-9.82	Beiwutine;
8.38_312.2530	1.67607	1.18e-04	1.11762	C10167	C18H35NO3	-4.51	(+)-Prosopinine;
8.40_645.4092	3.54831	1.98e-03	1.77808	C15884	C42H58O3	1.90	2-Ketospirilloxanthin; 2-Oxospirilloxanthin;	map01100 Metabolic pathways;
8.40_684.3504	6.54179	6.10e-03	2.32975	C08661	C36H51N3O10	0.32	Avadharidine; Aconitane-7,8-diol, 4-(((2-((4-amino-1,4-dioxobutyl)amino)benzoyl)oxy)methyl)-20-ethyl-1,6,14,16-tetramethoxy-, (1alpha,6beta,14alpha,16beta)-;
8.41_664.2884	5.91978	2.97e-04	1.93452	C08691	C34H47NO10	-1.64	Indaconitine;
8.44_504.2712	3.90911	1.05e-03	1.19329	C11995	C25H43NO7	-4.68	Neomethymycin;
8.44_550.2638	2.2348	4.25e-02	1.29696	C05122	C26H45NO7S	5.33	Taurocholate; Taurocholic acid; Cholyltaurine;	map00120 Primary bile acid biosynthesis; map00430 Taurine and hypotaurine metabolism; map01100 Metabolic pathways; map04976 Bile secretion;
8.44_618.2851	3.63502	1.96e-02	1.29856	C19989	C33H45NO8	1.95	Taxine B;
8.44_708.2354	4.2041	4.56e-02	1.56731	C08442	C28H43N5O12S	4.62	Ustiloxin; Ustiloxin A;
8.48_307.2634	4.25472	4.24e-03	1.37189	C16525	C20H36O2	-2.68	Icosadienoic acid; Eicosadienoic acid; 11,14-Icosadienoic acid; (11Z,14Z)-Icosa-11,14-dienoic acid; 11,14-Eicosadienoic acid; (11Z,14Z)-Eicosa-11,14-dienoic acid;	map01040 Biosynthesis of unsaturated fatty acids;
8.48_660.3527	3.12417	7.20e-03	1.52903	C20549	C39H51NO8	-2.21	Lolitrem J;
8.48_683.2652	3.42817	2.17e-02	2.39048	C09096	C37H44O10	3.62	Gnididin;
8.52_463.2067	0.58	1.52e-04	1.0248	C02808	C19H28N8O6	1.68	Acetylblasticidin S;
8.52_475.1630	0.58	1.63e-03	1.13805	C12276	C18H32CaN2O10	4.21	Calcium pantothenate;
8.52_531.1958	0.57	9.78e-04	1.2111	C08760	C25H36O10	-9.05	Glaucarubin;
8.52_543.1507	0.57	3.07e-03	1.03346	C12384	C27H28O12	-0.15	Premithramycin A1;
8.52_593.1624	0.56	8.40e-03	1.02045	C11662	C25H34O14	-3.30	7-Epiloganin tetraacetate;
8.55_492.3109	3.54562	1.70e-03	1.4935	C12065	C28H47NO4S	-8.83	Tiamulin;
8.59_433.1886	0.604341	9.48e-04	1.08994	C09226	C23H30N2O4	-3.53	Mitragynine;
8.59_569.1658	0.32	6.07e-04	1.53633	C18004	C17H35N4O13P	4.73	5''-Phosphoribostamycin;	map00524 Butirosin and neomycin biosynthesis;
8.60_439.2078	0.62	1.85e-04	1.12657	C14645	C27H32O3	7.95	Estradiol-17-phenylpropionate; Estra-1,3,5(10)-triene-3,17beta-diol 17-benzenepropionate;
8.62_386.2719	1.68599	1.84e-02	1.08941	C12160	C24H37NO3	4.72	Myxalamid C;
8.65_461.2013	0.57	4.11e-03	1.079	C17068	C21H34O11	-3.40	Valerosidatum; Valerosidate;
8.65_495.1521	0.57	5.78e-04	1.08558	C20383	C23H28O12	2.63	Mycophenolic acid O-acyl-glucuronide;
8.65_497.1513	0.545531	4.24e-03	1.12131	C12254	C26H26N2O6	6.18	(+)-Plicamine;
8.65_518.2862	2.58297	1.10e-02	1.30525	C20546	C32H41NO5	-9.65	Terpendole C;
8.65_539.1534	0.47	2.37e-03	1.26278	C10548	C28H28O11	-4.53	Cleistanthin A;
8.65_545.1666	0.62	3.05e-03	1.13994	C04194	C27H30O12	0.21	Flavonol 3-O-[alpha-L-rhamnosyl-(1->6)-beta-D-glucoside]; Flavonol 3-O-rutinoside;
8.65_563.1410	0.46	2.80e-03	1.37349	C11289	C24H32O11S	9.68	17beta-Estradiol 3-sulfate-17-(beta-D-glucuronide); Estradiol 17beta-glucuronide 3-sulfate;
8.66_722.2978	6.21278	5.32e-03	2.95416	C02090	C27H49N9O10S2	0.98	Trypanothione; N1,N8-Bis(gamma-L-glutamyl-L-cysteinyl-glycyl)spermidine; N1,N8-Bis(glutathionyl)spermidine; Reduced trypanothione;	map00480 Glutathione metabolism; map01100 Metabolic pathways;
8.67_708.2872	2.94498	1.10e-03	1.86112	C13167	C33H47N5O8S	4.91	Dihydro-alpha-ergocryptine mesylate; 9,10alpha-Dihydro-12'-hydroxy-5'alpha-isobutyl-2'-isopropylergotaman-3',6',18-trione monomethanesulphonate;
8.69_342.2453	2.15951	8.34e-03	1.31915	C20059	C22H33NO2	4.29	Samandenone;
8.69_564.2636	4.9633	3.04-03	2.55906	C15719	C21H39N7O11	0.26	Coelichelin;
8.69_961.6285	3.24852	1.27e-02	1.35541	C15956	C59H90O8	-4.85	Thermozeaxanthin-13;
8.70_329.2468	2.13772	1.22e-03	1.01851	C16513	C22H34O2	-5.52	(7Z,10Z,13Z,16Z,19Z)-Docosa-7,10,13,16,19-pentaenoic acid; Docosapentaenoic acid;	map01040 Biosynthesis of unsaturated fatty acids;
8.75_317.2474	2.27082	1.77e-03	1.15073	C05480	C21H34O2	-3.92	Pregnanolone; 3alpha-Hydroxy-5beta-pregnan-20-one;	map00140 Steroid hormone biosynthesis; map01100 Metabolic pathways;
8.75_476.2449	0.21	3.51e-04	2.26583	C15694	C26H39NO5S	-5.74	Epothilone C;
8.77_488.2174	1.67069	1.86e-03	1.05786	C20543	C27H35NO5	-7.75	Terpendole I;
8.79_743.4480	2.29492	7.66e-03	1.19209	C15942	C46H64O8	-6.54	(3S,2'S)-4-Ketomyxol 2'-alpha-L-fucoside;
8.83_293.2475	1.95026	3.36e-04	1.26403	C08366	C19H34O2	-3.68	Sterculic acid;
8.85_355.2625	2.18824	2.46e-03	1.08732	C16185	C24H36O2	-4.99	(4Z,7Z,10Z,13Z,16Z,19Z)-Docosahexaenoic acid ethyl ester; DHA ethyl ester;
8.87_428.3172	3.16375	6.51e-04	1.82283	C10808	C27H43NO3	0.40	Imperialine; Cevan-6-one, 3,20-dihydroxy-, (3-beta,5-alpha,17-beta)-; Kashmirine; Peiminine;
8.87_562.3125	9.49655	2.18e-03	2.71631	C15755	C28H49NO8	-5.13	Dihydropicromycin;
8.90_494.3604	10.1772	1.22e-03	2.38442	C15445	C33H49N	9.82	1'H-5alpha-Cholest-2-eno[3,2-b]indole;
8.92_313.2378	5.39157	1.85e-02	1.79885	C14829	C18H34O4	-1.87	12,13-DHOME; 12,13-DHOA; (9Z)-12,13-Dihydroxyoctadec-9-enoic acid;	map00591 Linoleic acid metabolism;
8.98_319.2636	3.35739	3.40e-03	1.70185	C05484	C21H36O2	-2.00	Pregnanediol; 5beta-Pregnane-3alpha,20alpha-diol; Pregnandiol; Diol;	map00140 Steroid hormone biosynthesis; map01100 Metabolic pathways;
9.01_375.2503	2.31817	1.52e-03	1.24155	C15157	C23H36O4	-9.94	3-Acetyl-5alpha-androstane-3beta,17beta-diol 3-acetate;
9.01_505.2101	2.57375	1.52e-04	1.4046	C01593	C26H34O10	4.29	Limonoate;
9.07_357.2784	3.07954	1.22e-03	1.4961	C19660	C24H38O2	-4.21	Bufanolide;
9.09_295.2624	2.92564	4.06e-04	1.56288	C13838	C19H36O2	-6.13	Lactobacillic acid; 11R,12S-Methylene-octadecanoic acid;
9.09_325.2742	2.26952	1.03e-04	1.41105	C02117	C20H38O3	-2.03	2-Oxophytanate; 2-Oxophytanic acid;
9.09_425.2312	2.28503	1.09e-04	1.27478	C19913	C22H37NO5P-	-5.79	Phospho-anandamide;	map04723 Retrograde endocannabinoid signaling;
9.14_260.9134	0.67	2.84e-02	1.01001	C12835	C6H4Cl2O5	1.91	2,5-Dichloro-4-oxohex-2-enedioate;	map01100 Metabolic pathways;
9.17_333.2776	2.26846	4.04e-04	1.07296	C16534	C22H38O2	-7.01	13,16,19-Docosatrienoic acid; (13E,16E,19E)-Docosa-13,16,19-trienoic acid;
9.17_362.9404	0.65	3.73e-02	1.08135	C05707	C8H16N2O4Se2	9.83	Selenohomocystine;
9.18_430.3323	3.36529	2.35e-02	2.19104	C17881	C27H45NO3	-0.78	Zhebeinine;
9.26_359.2941	3.65866	4.54e-03	1.56564	C19642	C24H40O2	-4.14	5beta-Cholanic acid; Ursocholanic acid;
9.26_427.2824	2.48492	2.71e-03	1.23755	C19900	C27H40O4	-6.93	12-epi-Scalaradial;
9.39_335.2939	4.40342	1.74e-03	1.82771	C16533	C22H40O2	-5.01	13,16-Docosadienoic acid; (13Z,16Z)-Docosa-13,16-dienoic acid;	map01040 Biosynthesis of unsaturated fatty acids;
9.42_297.2779	1.84706	1.68e-02	1.05561	C16794	C19H38O2	-6.62	Tuberculostearic acid;
9.42_427.2379	1.8474	1.18e--02	1.01206	C10011	C23H32N4O4	6.65	Nummularine F;
9.43_327.2900	7.4091	1.19e-03	2.24853	C02982	C20H40O3	-1.46	L-2-Hydroxyphytanate;
9.75_431.3138	4.98177	3.22e-02	2.42802	C18231	C27H44O4	-6.70	Calcitetrol;	map00100 Steroid biosynthesis; map01100 Metabolic pathways;
9.81_288.9364	0.66	1.84e-02	1.083	C18858	C7H5Cl2FN2O3	3.54	Fluroxypyr;
9.85_268.9528	0.55	4.02e-02	1.30769	C11020	C9H8Cl2O3	-7.22	2,4-DP; Dichlorprop; 2-(2,4-Dichlorophenoxy)propionic acid;
